# Supplementary material
Source: publisher figshare collection journal article supplement (https://acs.figshare.com/ndownloader/files/23392775)
Supplement: Supplementary file 1 [file 23392775]

# Supporting Information to Time-Resolved Probing of the Nonequilibrium Structural Solvation Dynamics by the Time-Dependent Stokes Shift

Henning Kirchberg\* and Michael Thorwart\*

*I. Institut für Theoretische Physik, Universität Hamburg, Jungiusstr. 9, 20355 Hamburg,  
Germany*

E-mail: henning.kirchberg@physik.uni-hamburg.de; michael.thorwart@physik.uni-hamburg.de

Phone: +49-(0)40-42838-3012

## Calculation of the first term in Eq. (8)

For the first term in Eq. (8) of the main text, we follow the back transform given in Ref.<sup>1</sup>

We obtain

$$\Delta E_0(t) = \frac{-\Delta\mu^2}{2\pi a_0^3} \int_C dz \frac{\chi(z)}{iz} e^{izt} \quad (\text{S1})$$

$$= -\frac{-\Delta\mu^2}{2\pi a_0^3} \int_C dz \frac{\chi(z) - \chi(0)}{iz} e^{izt} - \frac{-\Delta\mu^2}{2\pi a_0^3} \int_C dz \frac{\chi(0)}{iz} e^{izt}, \quad (\text{S2})$$

where  $C$  is the contour parallel to but slightly below the real axis. By means of the theorem of residues, the second term is equal to  $-\frac{\Delta\mu^2}{a_0^3} \chi(0) \Theta(t)$ .  $\chi(z)$  is analytic on the real axis and  $\chi(0)$  is a real number. Since  $\frac{\chi(z) - \chi(0)}{z} = [\frac{d\chi(z)}{dz}]_{z=0} + O(z)$  for  $z \rightarrow 0$  and since  $d\chi(z)/dz$  has

no singularity at  $z = 0$ , the term does not possess a pole at  $z = 0$ .

Therefore, the contour  $C$  may now coincide with the real axis. Moreover, we decompose  $\chi(\omega) = \Re[\chi(\omega)] + i\Im[\chi(\omega)]$  and use the fact that  $\chi(-\omega) = \chi^*(\omega)$  because  $\chi(t)$  is real. With this, we find that

$$\int_C dz \frac{\chi(z) - \chi(0)}{iz} e^{izt} = 2 \int_0^\infty d\omega \frac{\Im[\chi(\omega)]}{\omega} \cos(\omega t) + 2 \int_0^\infty d\omega \frac{\Re[\chi(\omega)] - \chi_s}{\omega} \sin(\omega t). \quad (\text{S3})$$

Thus, Eq. (S2) reads

$$\Delta E_0(t) = \frac{-\Delta\mu^2}{\pi a_0^3} \left[ \int_0^\infty d\omega \frac{\Im[\chi(\omega)]}{\omega} \cos(\omega t) + \int_0^\infty d\omega \frac{\Re[\chi(\omega)] - \chi_s}{\omega} \sin(\omega t) + \pi \chi_s \Theta(t) \right]. \quad (\text{S4})$$

Since  $\Delta E_0(t) = 0$  for  $t < 0$  and the first and second integrand are equal for positive  $t$ , Eq. (S4) yields

$$\Delta E_0(t) = \frac{-2\Delta\mu^2}{\pi a_0^3} \int_0^\infty d\omega \frac{\Im[\chi(\omega)]}{\omega} \cos[\omega t] - \frac{\Delta\mu^2}{a_0^3} \chi_s \Theta(t). \quad (\text{S5})$$

## References

- (1) Hsu, C.-P.; Song, X.; Marcus, R. A. Time-Dependent Stokes Shift and Its Calculation from Solvent Dielectric Dispersion Data. *J. Phys. Chem. B* **1997**, *101*, 2546-2551.
